# Supplementary material for: Hypothalamic transcriptome analysis reveals the neuroendocrine mechanisms in controlling broodiness of Muscovy duck (Cairina moschata)
Source: PLoS One. 2019 May 9;14(5):e0207050. doi: 10.1371/journal.pone.0207050 (PMC6508920; doi:10.1371/journal.pone.0207050)
Supplement: S1 Table — (XLSX) [file pone.0207050.s002.xlsx]

## Sheet: Sheet1
S1 Table. Mapped statistical results of 12 libraries
Sample	Genes Num	All Reference Genes Num	Ratio	All Reads Num	Unmapped Reads	Unique Mapped Reads	Multiple Mapped Reads	Mapping Ratio
LA1	95620	115001	0.8315	56195670	9978733(17.76%)	45099297(80.25%)	1117640(1.99%)	0.8224
LA2	88608		0.7705	61342616	10088378(16.45%)	50066231(81.62%)	1188007(1.94%)	0.8355
LA3	93993		0.8173	59710946	9961391(16.68%)	48555487(81.32%)	1194068(2%)	0.8332
LA4	94854		0.8248	56716128	9504019(16.76%)	46105374(81.29%)	1106735(1.95%)	0.8324
BP1	89898		0.7817	57878952	9341359(16.14%)	47380616(81.86%)	1156977(2%)	0.8386
BP2	85873		0.7467	53076056	8807621(16.59%)	43200184(81.39%)	1068251(2.01%)	0.8341
BP3	93382		0.812	53591452	8886173(16.58%)	43680980(81.51%)	1024299(1.91%)	0.8342
BP4	91874		0.7989	55358676	9183326(16.59%)	45113883(81.49%)	1061467(1.92%)	0.8341
BM1	82494		0.7173	51509098	8467813(16.44%)	41945770(81.43%)	1095515(2.13%)	0.8356
BM2	86465		0.7519	67374714	10792416(16.02%)	55208603(81.94%)	1373695(2.04%)	0.8398
BM3	91710		0.7975	53204440	8897527(16.72%)	43250714(81.29%)	1056199(1.99%)	0.8328
BM4	84778		0.7372	60622374	9738460(16.06%)	49671819(81.94%)	1212095(2%)	0.8394
