# Supplementary material for: Hypothalamic transcriptome analysis reveals the neuroendocrine mechanisms in controlling broodiness of Muscovy duck (Cairina moschata)
Source: PLoS One. 2019 May 9;14(5):e0207050. doi: 10.1371/journal.pone.0207050 (PMC6508920; doi:10.1371/journal.pone.0207050)
Supplement: S4 Table — (XLSX) [file pone.0207050.s005.xlsx]

## Sheet: Sheet1
S4 Table. The differently expressed genes detected between BP and BM
geneID	Gene Symbol	Nr.ID	LP_rpkm	BP_rpkm	FoldChange	Pvalue	FDR	Description
Unigene0000400	DUSP1	gi|701377944|acc|XP_009987712.1|	40.025	23.7475	-0.753126	0.00800908	0.596062	PREDICTED: dual specificity protein phosphatase 1, partial [Tauraco erythrolophus]
Unigene0000503	KRT6C	gi|483495317|acc|EOA93537.1|	15.23	10.1	-0.592561	0.023636	0.850093	Keratin, type II cytoskeletal 6C, partial [Anas platyrhynchos]
Unigene0000928	CFD	gi|768397868|acc|XP_011594751.1|	29.8225	19.345	-0.62444	0.0136211	0.720515	PREDICTED: complement factor D [Aquila chrysaetos canadensis]
Unigene0001379	RDH10	gi|55732661|acc|CAH93029.1|	6.9825	3.59	-0.95976	0.00013577	0.0479239	hypothetical protein [Pongo abelii]
Unigene0001697	Scaf1	gi|527243089|acc|XP_005139899.1|	3.925	6.495	0.726637	0.00327338	0.383042	PREDICTED: splicing factor, arginine/serine-rich 19-like, partial [Melopsittacus undulatus]
Unigene0002104	LAMA5	gi|874448130|acc|XP_005010511.2|	109.907	72.94	-0.591508	0.0132488	0.710682	PREDICTED: laminin subunit alpha-5 [Anas platyrhynchos]
Unigene0002442	LINC00116	gi|637364389|acc|XP_008120842.1|	8.885	13.905	0.64616	0.0186845	0.793472	PREDICTED: uncharacterized protein LINC00116 homolog [Anolis carolinensis]
Unigene0002444	GPR98	gi|874468246|acc|XP_012953189.1|	14.535	8.4925	-0.77527	0.00106547	0.199821	PREDICTED: LOW QUALITY PROTEIN: G-protein coupled receptor 98 [Anas platyrhynchos]
Unigene0003003	PIH1D3	gi|514705202|acc|XP_005009717.1|	17.215	9.3425	-0.881786	2.7976e-05	0.0139329	PREDICTED: protein PIH1D3 [Anas platyrhynchos]
Unigene0004144	ADO	gi|1003867289|acc|XP_015721757.1|	5.955	9.96	0.742044	0.00508321	0.481177	PREDICTED: 2-aminoethanethiol dioxygenase [Coturnix japonica]
Unigene0004532	acdh-6	gi|874449707|acc|XP_012965437.1|	13.4875	5.7575	-1.22811	7.18469e-05	0.0288858	PREDICTED: probable acyl-CoA dehydrogenase 6 isoform X4 [Anas platyrhynchos]
Unigene0004636	PRL	gi|84574985|acc|CAJ55836.1|	182.817	554.265	1.60017	3.73677e-05	0.0172866	prolactin [Sarkidiornis melanotos]
Unigene0004765	Nexn	gi|677490415|acc|KFQ79820.1|	13.2725	8.5925	-0.62729	0.0457205	1	Nexilin, partial [Phoenicopterus ruber ruber]
Unigene0004822	ANO6	gi|483524370|acc|EOB08377.1|	11.755	5.5675	-1.07817	0.000942392	0.187211	Transmembrane protein 16F, partial [Anas platyrhynchos]
Unigene0005072	ZBTB4	gi|768406532|acc|XP_011599409.1|	6.16	9.5725	0.635965	0.0387598	0.973306	PREDICTED: zinc finger and BTB domain-containing protein 4, partial [Aquila chrysaetos canadensis]
Unigene0006425	FOS	gi|1003783222|acc|XP_015720719.1|	73.29	43.2275	-0.761667	0.0265008	0.882512	PREDICTED: proto-oncogene c-Fos [Coturnix japonica]
Unigene0006431	ABCA13	gi|902896312|acc|XP_013037427.1|	5.48	2.385	-1.20019	0.000221387	0.0683721	PREDICTED: LOW QUALITY PROTEIN: ATP-binding cassette sub-family A member 13 [Anser cygnoides domesticus]
Unigene0006558	SLC16A9	gi|874462387|acc|XP_012951273.1|	35.0925	19.0325	-0.882698	1.07538e-05	0.00623811	PREDICTED: monocarboxylate transporter 9 [Anas platyrhynchos]
Unigene0006904	RIPK4	gi|874491281|acc|XP_012960904.1|	6.55	3.0725	-1.09208	0.000112884	0.042165	PREDICTED: receptor-interacting serine/threonine-protein kinase 4 [Anas platyrhynchos]
Unigene0007512	EIF5B	gi|1020958495|acc|XP_016158154.1|	6.985	11.715	0.746025	0.000748814	0.161386	PREDICTED: translation initiation factor IF-2-like [Ficedula albicollis]
Unigene0008707	BMP3	gi|902915135|acc|XP_013046105.1|	7.675	1.9	-2.01417	9.88894e-09	1.11566e-05	PREDICTED: LOW QUALITY PROTEIN: bone morphogenetic protein 3 [Anser cygnoides domesticus]
Unigene0009106	LRP11	gi|1003761123|acc|XP_015713601.1|	2.595	6.3725	1.29612	0.002436	0.329581	PREDICTED: low-density lipoprotein receptor-related protein 11 [Coturnix japonica]
Unigene0009837	CD79A	gi|950922547|acc|XP_006277781.2|	2.04	3.6125	0.824428	0.00106362	0.199821	PREDICTED: B-cell antigen receptor complex-associated protein alpha chain isoform X1 [Alligator mississippiensis]
Unigene0010430	PLVAP	gi|874504481|acc|XP_012965305.1|	6.295	3.1275	-1.0092	2.60406e-05	0.013207	PREDICTED: plasmalemma vesicle-associated protein [Anas platyrhynchos]
Unigene0010542	DNAH5	gi|902894631|acc|XP_013036651.1|	15.2575	8.2	-0.895823	0.00211728	0.306405	PREDICTED: dynein heavy chain 5, axonemal-like [Anser cygnoides domesticus]
Unigene0010611	cygb	gi|1051200101|acc|XP_017683162.1|	21.19	1.405	-3.91474	1.55595e-19	6.14396e-16	PREDICTED: cytoglobin-1-like isoform X1 [Lepidothrix coronata]
Unigene0011116	RFX2	gi|704335616|acc|XP_010173547.1|	10.785	7.0125	-0.621025	0.002144	0.30857	PREDICTED: LOW QUALITY PROTEIN: DNA-binding protein RFX2-like, partial [Caprimulgus carolinensis]
Unigene0011266	CCDC13	gi|514761656|acc|XP_005023304.1|	13.91	9.0125	-0.626123	0.0285445	0.899962	PREDICTED: coiled-coil domain-containing protein 13 [Anas platyrhynchos]
Unigene0011547	PLEKHH1	gi|902879191|acc|XP_013029635.1|	12.125	7.51	-0.6911	0.00513164	0.483279	PREDICTED: pleckstrin homology domain-containing family H member 1 [Anser cygnoides domesticus]
Unigene0011644	SLC41A1	gi|704291610|acc|XP_010176349.1|	61.62	39.8025	-0.63054	0.00286942	0.35694	PREDICTED: solute carrier family 41 member 1 [Caprimulgus carolinensis]
Unigene0012234	WDPCP	gi|874469641|acc|XP_012953648.1|	5.67	2.0175	-1.49078	2.08807e-09	2.53696e-06	PREDICTED: WD repeat-containing and planar cell polarity effector protein fritz homolog isoform X2 [Anas platyrhynchos]
Unigene0012415	TH	gi|514746966|acc|XP_005019806.1|	36.6325	61.42	0.745584	6.52358e-07	0.000511537	PREDICTED: tyrosine 3-monooxygenase [Anas platyrhynchos]
Unigene0013135	DRC1	gi|483507547|acc|EOA98054.1|	12.0925	7.9875	-0.598297	0.014268	0.732219	UPF0407 protein C2orf39, partial [Anas platyrhynchos]
Unigene0017183	ACKR3	gi|902889601|acc|XP_013034262.1|	81.505	19.1025	-2.09313	6.49588e-16	1.89001e-12	PREDICTED: atypical chemokine receptor 3 isoform X1 [Anser cygnoides domesticus]
Unigene0017434	LRP2	gi|874471865|acc|XP_012954363.1|	17.96	7.35	-1.28897	1.65853e-07	0.00015281	PREDICTED: low-density lipoprotein receptor-related protein 2 isoform X4 [Anas platyrhynchos]
Unigene0017886	RBM47	gi|902905126|acc|XP_013041463.1|	10.2625	1.695	-2.59803	2.02639e-16	6.40124e-13	PREDICTED: LOW QUALITY PROTEIN: RNA-binding protein 47 [Anser cygnoides domesticus]
Unigene0018020	ADAMTS8	gi|971431704|acc|XP_015153616.1|	33.995	22.205	-0.614438	0.0113747	0.670106	PREDICTED: A disintegrin and metalloproteinase with thrombospondin motifs 8 [Gallus gallus]
Unigene0018213	CCDC81	gi|697446828|acc|KGL87061.1|	27.105	4.8	-2.49745	4.69837e-07	0.000390576	Coiled-coil domain-containing protein 81, partial [Charadrius vociferus]
Unigene0018214	CCDC81	gi|971449107|acc|XP_015129347.1|	23.54	5.6225	-2.06583	1.62119e-07	0.000150624	PREDICTED: coiled-coil domain-containing protein 81-like [Gallus gallus]
Unigene0018369	env	gi|971382381|acc|XP_015131477.1|	8.0925	13.9125	0.781724	0.0349537	0.944595	PREDICTED: LOW QUALITY PROTEIN: syncytin-1-like [Gallus gallus]
Unigene0018611	FOXJ1	gi|483524101|acc|EOB08195.1|	11.4375	6.5625	-0.801454	0.00114229	0.210492	Forkhead box protein J1, partial [Anas platyrhynchos]
Unigene0018902	PTGDS	gi|514725123|acc|XP_005014848.1|	1450.51	611.923	-1.24514	1.85912e-09	2.3358e-06	PREDICTED: lipocalin-like [Anas platyrhynchos]
Unigene0019261	TRPM3	gi|971439294|acc|XP_015135821.1|	8.7325	4.3375	-1.00953	0.00334526	0.388103	PREDICTED: transient receptor potential cation channel subfamily M member 3 isoform X6 [Gallus gallus]
Unigene0019294	SAXO2	gi|874494512|acc|XP_012962027.1|	19.45	12.46	-0.642466	0.0236074	0.849919	PREDICTED: protein FAM154B isoform X4 [Anas platyrhynchos]
Unigene0019976	MYO5C	gi|874503423|acc|XP_012964947.1|	3.91	2.085	-0.907121	0.00743564	0.576519	PREDICTED: unconventional myosin-Vc [Anas platyrhynchos]
Unigene0020170	CCDC30	gi|874459175|acc|XP_012950161.1|	23.59	13.8975	-0.76335	0.000452612	0.114655	PREDICTED: coiled-coil domain-containing protein 30 [Anas platyrhynchos]
Unigene0020311	-	gi|449265613|acc|EMC76777.1|	12.51	24.0375	0.942205	0.0101072	0.647327	Kininogen-1a, partial [Columba livia]
Unigene0020324	OAM	gi|449266103|acc|EMC77213.1|	16.7575	26.8975	0.682665	0.000588205	0.138538	Ovarian abundant message protein, partial [Columba livia]
Unigene0020559	ITGA1	gi|902893298|acc|XP_013035993.1|	20.82	7.1375	-1.54448	7.98665e-05	0.0318783	PREDICTED: integrin alpha-1 [Anser cygnoides domesticus]
Unigene0020589	LOC106165558	gi|919031281|acc|XP_013399257.1|	2.545	4.415	0.794748	0.000743162	0.160481	PREDICTED: coiled-coil domain-containing protein 40-like isoform X2 [Lingula anatina]
Unigene0020640	MYO5B	gi|902899119|acc|XP_013038675.1|	26.705	13.5	-0.98415	0.000453173	0.114655	PREDICTED: unconventional myosin-Vb isoform X1 [Anser cygnoides domesticus]
Unigene0020882	-	gi|449280820|acc|EMC88045.1|	3.295	1.485	-1.14982	0.0030582	0.369939	hypothetical protein A306_03063 [Columba livia]
Unigene0021313	SLC2A12	gi|514722157|acc|XP_005014147.1|	24.8275	4.305	-2.52785	8.44835e-23	4.67037e-19	PREDICTED: solute carrier family 2, facilitated glucose transporter member 12 [Anas platyrhynchos]
Unigene0021655	NR4A3	gi|225196207|acc|ACN82376.1|	7.3325	4.0325	-0.862631	0.00157028	0.258356	neuron-derived nuclear orphan receptor, partial [Taeniopygia guttata]
Unigene0021659	SMPD3	gi|700345353|acc|XP_009916624.1|	79.1225	48.35	-0.710572	0.00729567	0.572079	PREDICTED: sphingomyelin phosphodiesterase 3-like, partial [Haliaeetus albicilla]
Unigene0021767	ANKRD33	gi|696976674|acc|XP_009557683.1|	35.14	60.5775	0.785668	0.00885691	0.617461	PREDICTED: LOW QUALITY PROTEIN: ankyrin repeat domain-containing protein 33 [Cuculus canorus]
Unigene0021889	MYOD1	gi|878272853|acc|NP_001297287.1|	14.7675	8.6525	-0.771237	0.00131674	0.228903	myogenic differentiation 1 [Anas platyrhynchos]
Unigene0021897	CCDC180	gi|874455978|acc|XP_012949081.1|	6.095	2.0525	-1.57024	0.000119202	0.0437851	PREDICTED: coiled-coil domain-containing protein 180 [Anas platyrhynchos]
Unigene0022003	LOC106049689	gi|902938991|acc|XP_013057541.1|	6.23	1.81	-1.78324	3.16452e-05	0.015267	PREDICTED: uncharacterized protein LOC106049689 isoform X2 [Anser cygnoides domesticus]
Unigene0022491	ALMS1	gi|960953995|acc|XP_014791524.1|	26.025	16.8725	-0.625224	0.00860394	0.614166	PREDICTED: Alstrom syndrome protein 1 isoform X1 [Calidris pugnax]
Unigene0022543	-	gi|483514651|acc|EOB02185.1|	3.89	1.7875	-1.12183	0.00288966	0.358314	hypothetical protein Anapl_05378 [Anas platyrhynchos]
Unigene0023074	ADAMTS17	gi|960973199|acc|XP_014801580.1|	15.0675	6.8375	-1.1399	0.000210547	0.0665105	PREDICTED: A disintegrin and metalloproteinase with thrombospondin motifs 17 [Calidris pugnax]
Unigene0023381	GLP1R	gi|483510038|acc|EOA99458.1|	67.4525	31.88	-1.08122	4.99992e-07	0.000406475	Glucagon receptor, partial [Anas platyrhynchos]
Unigene0023679	PLEKHA7	gi|874477834|acc|XP_012956418.1|	10.2925	6.5475	-0.652577	0.0363947	0.958759	PREDICTED: pleckstrin homology domain-containing family A member 7 isoform X10 [Anas platyrhynchos]
Unigene0023694	CCDC180	gi|902922301|acc|XP_013049447.1|	7.0775	2.7975	-1.3391	5.03693e-05	0.0218391	PREDICTED: coiled-coil domain-containing protein 180 isoform X2 [Anser cygnoides domesticus]
Unigene0023728	CCDC42B	gi|686617696|acc|XP_009285809.1|	10.34	5.765	-0.842844	0.00193183	0.292285	PREDICTED: coiled-coil domain-containing protein 42B [Aptenodytes forsteri]
Unigene0024096	HYDIN	gi|874503433|acc|XP_012964950.1|	24.9175	14.75	-0.756444	0.00148546	0.248746	PREDICTED: LOW QUALITY PROTEIN: hydrocephalus-inducing protein homolog, partial [Anas platyrhynchos]
Unigene0024240	C8orf47	gi|961009198|acc|XP_014820675.1|	11.51	3.08	-1.90189	5.36153e-12	1.09775e-08	PREDICTED: glutamate-rich protein 5 isoform X1 [Calidris pugnax]
Unigene0024275	ATF3	gi|959058836|acc|XP_014732420.1|	9.525	4.1125	-1.2117	0.00307698	0.370871	PREDICTED: cyclic AMP-dependent transcription factor ATF-3 [Sturnus vulgaris]
Unigene0024512	ENPP2	gi|902903041|acc|XP_013040501.1|	924.003	521.827	-0.824324	1.03837e-05	0.00610669	PREDICTED: ectonucleotide pyrophosphatase/phosphodiesterase family member 2 isoform X6 [Anser cygnoides domesticus]
Unigene0024734	KRT5	gi|902936406|acc|XP_013056224.1|	5.645	2.9675	-0.927726	0.00132707	0.230337	PREDICTED: keratin, type II cytoskeletal 5-like [Anser cygnoides domesticus]
Unigene0024943	TEKT4	gi|483522462|acc|EOB07148.1|	6.9125	3.75	-0.882317	0.0026873	0.346692	Tektin-4, partial [Anas platyrhynchos]
Unigene0025265	SLC22A15	gi|874462523|acc|XP_012951327.1|	14.7625	8.94	-0.72359	0.00217766	0.310511	PREDICTED: solute carrier family 22 member 15-like [Anas platyrhynchos]
Unigene0025641	FEV	gi|679189535|acc|KFW80150.1|	5.48	10.82	0.981453	3.59008e-05	0.0167481	Protein FEV, partial [Manacus vitellinus]
Unigene0025671	PER2	gi|874498285|acc|XP_012963269.1|	3.025	1.3725	-1.14013	0.00241718	0.328317	PREDICTED: period circadian protein homolog 2 isoform X3 [Anas platyrhynchos]
Unigene0025858	SOCS3	gi|902930499|acc|XP_013053339.1|	5.545	3.045	-0.864745	0.00463204	0.4589	PREDICTED: suppressor of cytokine signaling 3 [Anser cygnoides domesticus]
Unigene0026527	OCA2	gi|874488211|acc|XP_005024896.2|	4.5875	1.2	-1.93467	7.29985e-06	0.00445908	PREDICTED: P protein isoform X1 [Anas platyrhynchos]
Unigene0026571	OGN	gi|514771643|acc|XP_005025680.1|	19.225	1.9175	-3.32569	2.60768e-15	7.20782e-12	PREDICTED: mimecan [Anas platyrhynchos]
Unigene0026736	FBXO21	gi|514738984|acc|XP_005017922.1|	19.9175	4.635	-2.1034	2.76204e-15	7.44827e-12	PREDICTED: F-box only protein 21-like isoform X2 [Anas platyrhynchos]
Unigene0027473	ITGA10	gi|768402052|acc|XP_011596987.1|	8.34	13.2875	0.67195	0.000132023	0.0469353	PREDICTED: integrin alpha-10 [Aquila chrysaetos canadensis]
Unigene0027652	RGS22	gi|874494134|acc|XP_012961907.1|	10.69	2.9775	-1.84409	2.2066e-06	0.0015248	PREDICTED: regulator of G-protein signaling 22 isoform X1 [Anas platyrhynchos]
Unigene0027842	OTX2	gi|61098455|acc|NP_989851.2|	20.9425	8.3525	-1.32615	6.99118e-09	8.05173e-06	homeobox protein OTX2 [Gallus gallus]
Unigene0027985	MYB	gi|514722114|acc|XP_005014137.1|	4.6225	2.21	-1.06463	1.06822e-05	0.00623811	PREDICTED: transcriptional activator Myb isoform X3 [Anas platyrhynchos]
Unigene0028186	TCF24	gi|483513447|acc|EOB01529.1|	14.2625	7.02	-1.02268	0.000194588	0.0627236	Musculin [Anas platyrhynchos]
Unigene0029134	NYNRIN	gi|946671639|acc|XP_014432217.1|	104.017	157.917	0.602345	0.00031854	0.0878642	PREDICTED: protein NYNRIN-like [Pelodiscus sinensis]
Unigene0030194	LOC101798642	gi|514781926|acc|XP_005027969.1|	4.9675	7.5375	0.601566	0.00303057	0.368546	PREDICTED: ovomucoid [Anas platyrhynchos]
Unigene0030322	SCN4B	gi|119587748|acc|EAW67344.1|	4.65	2.015	-1.20645	2.63052e-05	0.0132803	hCG2039870, partial [Homo sapiens]
Unigene0030492	GLDN	gi|514778827|acc|XP_005027236.1|	2.7275	5.1525	0.917693	0.00016301	0.0552849	PREDICTED: gliomedin isoform X2 [Anas platyrhynchos]
Unigene0031106	RTKN2	gi|483517874|acc|EOB04271.1|	6.19	3.6975	-0.743389	0.00240471	0.327823	Rhotekin-2, partial [Anas platyrhynchos]
Unigene0031204	TRPC4	gi|483514517|acc|EOB02122.1|	20.915	12.1475	-0.783879	0.0196	0.802504	Short transient receptor potential channel 4, partial [Anas platyrhynchos]
Unigene0031359	BFSP1	gi|514708415|acc|XP_005010889.1|	15.815	7.1	-1.1554	9.94317e-05	0.0381718	PREDICTED: filensin [Anas platyrhynchos]
Unigene0031676	ENKUR	gi|902874668|acc|XP_013027492.1|	12.6875	6.995	-0.859012	0.0362548	0.957699	PREDICTED: enkurin [Anser cygnoides domesticus]
Unigene0032315	SLC18A2	gi|874480578|acc|XP_012957373.1|	98.0625	153.398	0.645502	3.17593e-05	0.015267	PREDICTED: synaptic vesicular amine transporter [Anas platyrhynchos]
Unigene0032730	-	gi|514763134|acc|XP_005023664.1|	3.1075	1.3125	-1.24344	0.00024117	0.0716788	PREDICTED: uncharacterized protein LOC101792586 isoform X2 [Anas platyrhynchos]
Unigene0032753	IL1R1	gi|514719263|acc|XP_005013466.1|	4.08	1.8275	-1.1587	9.1369e-05	0.0356962	PREDICTED: interleukin-1 receptor type 1-like [Anas platyrhynchos]
Unigene0033349	C2orf50	gi|514722294|acc|XP_005014179.1|	3.14	1.6275	-0.948107	0.00372798	0.414664	PREDICTED: uncharacterized protein C2orf50 homolog isoform X1 [Anas platyrhynchos]
Unigene0033865	SLC35G1	gi|874456902|acc|XP_012949395.1|	57.235	10.9025	-2.39224	2.46011e-11	4.24996e-08	PREDICTED: solute carrier family 35 member G1 [Anas platyrhynchos]
Unigene0034575	SLC6A4	gi|514761196|acc|XP_005023199.1|	60.3375	109.338	0.857661	0.000200431	0.0638623	PREDICTED: sodium-dependent serotonin transporter [Anas platyrhynchos]
Unigene0034587	PRDM16	gi|874450007|acc|XP_012947111.1|	8.44	3.0625	-1.46253	0.000595933	0.138951	PREDICTED: PR domain zinc finger protein 16 isoform X4 [Anas platyrhynchos]
Unigene0034602	SLC14A2	gi|902898913|acc|XP_013038586.1|	12.8	5.9125	-1.1143	0.000693845	0.154043	PREDICTED: urea transporter 2 [Anser cygnoides domesticus]
Unigene0035477	SLC23A1	gi|859769063|acc|XP_012907895.1|	4.6575	1.27	-1.87473	5.51907e-06	0.00348689	PREDICTED: solute carrier family 23 member 1 isoform X7 [Mustela putorius furo]
Unigene0036005	tbpp2a	gi|514724666|acc|XP_005014738.1|	11.1125	6.3875	-0.79886	0.0278439	0.895443	PREDICTED: tetratricopeptide repeat protein 29 isoform X2 [Anas platyrhynchos]
Unigene0036117	ADAMTS7	gi|874444869|acc|XP_012949026.1|	5.2125	3.2475	-0.682646	0.00675698	0.553797	PREDICTED: A disintegrin and metalloproteinase with thrombospondin motifs 7, partial [Anas platyrhynchos]
Unigene0036350	DSP	gi|902890625|acc|XP_013034741.1|	26.8975	5.855	-2.19973	3.79167e-15	9.74927e-12	PREDICTED: desmoplakin isoform X1 [Anser cygnoides domesticus]
Unigene0036469	PKP2	gi|971372248|acc|XP_416362.5|	14.905	9.93	-0.585931	0.00412351	0.437961	PREDICTED: plakophilin-2 [Gallus gallus]
Unigene0036836	PPP1R1C	gi|971405126|acc|XP_015145037.1|	9.2525	5.3125	-0.800452	0.00165428	0.26701	PREDICTED: protein phosphatase 1 regulatory subunit 1C isoform X2 [Gallus gallus]
Unigene0037057	ESPN	gi|971428935|acc|XP_015152452.1|	10.89	5.2225	-1.06019	0.000522054	0.127699	PREDICTED: espin isoform X4 [Gallus gallus]
Unigene0037113	LRAT	gi|1003770083|acc|XP_015716439.1|	49.885	5.825	-3.09828	3.15737e-33	4.3636e-29	PREDICTED: lecithin retinol acyltransferase [Coturnix japonica]
Unigene0037629	PIPOX	gi|960986469|acc|XP_014808564.1|	5.18	10.4525	1.01282	0.000214079	0.066959	PREDICTED: peroxisomal sarcosine oxidase [Calidris pugnax]
Unigene0038467	WWC2	gi|514792925|acc|XP_005030568.1|	21.12	10.63	-0.990468	0.000279105	0.0787212	PREDICTED: protein WWC2 isoform X1 [Anas platyrhynchos]
Unigene0038594	FRMPD2	gi|874481213|acc|XP_012957593.1|	8.6225	3.18	-1.43908	6.25415e-05	0.0259954	PREDICTED: FERM and PDZ domain-containing protein 2 isoform X1 [Anas platyrhynchos]
Unigene0038792	QRICH2	gi|676419112|acc|KFO62035.1|	2.4175	3.71	0.617903	0.00909905	0.622922	Glutamine-rich protein 2, partial [Corvus brachyrhynchos]
Unigene0038877	LMNTD1	gi|874483546|acc|XP_012958387.1|	4.655	1.755	-1.40731	1.69995e-06	0.00121259	PREDICTED: lamin tail domain-containing protein 1 [Anas platyrhynchos]
Unigene0038939	TPH2	gi|733869155|acc|XP_010706494.1|	83.185	149.49	0.845654	8.12705e-05	0.0322061	PREDICTED: tryptophan 5-hydroxylase 2 [Meleagris gallopavo]
Unigene0039524	SCN4A	gi|677396346|acc|KFQ13298.1|	4.785	3.03	-0.659201	0.00858751	0.61414	Sodium channel protein type 5 subunit alpha, partial [Leptosomus discolor]
Unigene0039566	USP49	gi|514762369|acc|XP_005023474.1|	5.2525	3.305	-0.668354	0.0099567	0.644766	PREDICTED: ubiquitin carboxyl-terminal hydrolase 49 isoform X1 [Anas platyrhynchos]
Unigene0039945	SLC11A1	gi|960988583|acc|XP_014809686.1|	5.54	3.19	-0.79633	0.000636438	0.145385	PREDICTED: natural resistance-associated macrophage protein 1 [Calidris pugnax]
Unigene0040000	SFRP1	gi|1051208221|acc|XP_017687325.1|	23.4975	9.635	-1.28615	1.35855e-07	0.000129487	PREDICTED: secreted frizzled-related protein 1 isoform X1 [Lepidothrix coronata]
Unigene0040125	ABCA12	gi|874479867|acc|XP_012957098.1|	3.9975	2.2575	-0.824372	0.00102815	0.197697	PREDICTED: ATP-binding cassette sub-family A member 12 isoform X2 [Anas platyrhynchos]
Unigene0040969	SLC12A8	gi|514737643|acc|XP_005017610.1|	6.7175	1.495	-2.16778	1.2446e-10	1.96581e-07	PREDICTED: solute carrier family 12 member 8 isoform X2 [Anas platyrhynchos]
Unigene0041492	TRPM1	gi|874489816|acc|XP_012960422.1|	15.105	2.6775	-2.49607	3.10831e-15	8.18248e-12	PREDICTED: transient receptor potential cation channel subfamily M member 1 isoform X4 [Anas platyrhynchos]
Unigene0041554	ODF3	gi|768402704|acc|XP_011597341.1|	10.605	3.6175	-1.55168	2.36095e-09	2.83732e-06	PREDICTED: outer dense fiber protein 3B [Aquila chrysaetos canadensis]
Unigene0041979	RDH10	gi|944295698|acc|KQL59188.1|	14.005	7.065	-0.987181	0.000128912	0.0461258	retinol dehydrogenase 10 isoform X1 [Amazona aestiva]
Unigene0042178	F13A1	gi|874449105|acc|XP_012963455.1|	4.7675	2.015	-1.24245	6.52244e-05	0.0266103	PREDICTED: coagulation factor XIII A chain isoform X1 [Anas platyrhynchos]
Unigene0042683	CRISPLD1	gi|514781513|acc|XP_005027869.1|	12.4525	6.1525	-1.01719	0.000420951	0.107985	PREDICTED: cysteine-rich secretory protein LCCL domain-containing 1 isoform X1 [Anas platyrhynchos]
Unigene0042685	CTGF	gi|960991408|acc|XP_014811142.1|	127.858	73.7175	-0.794458	0.00250053	0.333494	PREDICTED: connective tissue growth factor [Calidris pugnax]
Unigene0042799	CCDC3	gi|902928823|acc|XP_013052562.1|	12.6675	6.9725	-0.861384	0.00127892	0.225405	PREDICTED: coiled-coil domain-containing protein 3 [Anser cygnoides domesticus]
Unigene0042896	HECTD2	gi|874456932|acc|XP_012949405.1|	21.83	12.0125	-0.861776	0.00876336	0.617461	PREDICTED: probable E3 ubiquitin-protein ligase HECTD2 isoform X2 [Anas platyrhynchos]
Unigene0043212	ENPP2	gi|768344870|acc|XP_011600413.1|	8.785	1.4475	-2.60148	4.56335e-17	1.5289e-13	PREDICTED: ectonucleotide pyrophosphatase/phosphodiesterase family member 2 isoform X1 [Aquila chrysaetos canadensis]
Unigene0043259	TFPI2	gi|514708846|acc|XP_005010988.1|	47.5775	21.3075	-1.15892	7.72641e-07	0.000585106	PREDICTED: tissue factor pathway inhibitor 2 [Anas platyrhynchos]
Unigene0043350	SLCO1C1	gi|514760738|acc|XP_005023090.1|	8.435	3.0375	-1.4735	7.51693e-07	0.000581185	PREDICTED: solute carrier organic anion transporter family member 1C1-like isoform X2 [Anas platyrhynchos]
Unigene0043383	SERTAD4	gi|514784822|acc|XP_005028638.1|	12.5625	7.5525	-0.734097	0.00050842	0.124917	PREDICTED: SERTA domain-containing protein 4, partial [Anas platyrhynchos]
Unigene0043550	-	gi|678212766|acc|KFV79745.1|	11.0375	5.97	-0.886611	0.00201183	0.29744	hypothetical protein N308_04290, partial [Struthio camelus australis]
Unigene0043813	TMEM68	gi|514780096|acc|XP_005027538.1|	11.535	3.255	-1.82529	1.11398e-11	2.05274e-08	PREDICTED: transmembrane protein 68 isoform X1 [Anas platyrhynchos]
Unigene0044024	GNG11	gi|514708850|acc|XP_005010989.1|	113.335	8.6925	-3.70468	1.57428e-26	1.24327e-22	PREDICTED: guanine nucleotide-binding protein G(I)/G(S)/G(O) subunit gamma-11 [Anas platyrhynchos]
Unigene0044047	STEAP1	gi|514739109|acc|XP_005017951.1|	5.7	1.7825	-1.67706	3.40646e-10	4.76744e-07	PREDICTED: metalloreductase STEAP1 isoform X1 [Anas platyrhynchos]
Unigene0044060	SLC2A10	gi|874464502|acc|XP_012951985.1|	3.8475	2.0575	-0.903029	0.00348017	0.39748	PREDICTED: solute carrier family 2, facilitated glucose transporter member 10 isoform X5 [Anas platyrhynchos]
Unigene0044211	TPTE2	gi|514725349|acc|XP_005014905.1|	15.9175	10.315	-0.62587	0.00835143	0.607702	PREDICTED: phosphatidylinositol 3,4,5-trisphosphate 3-phosphatase TPTE2 [Anas platyrhynchos]
Unigene0044235	ATP6V1A	gi|915562701|acc|XP_013226999.1|	4.29	1.9825	-1.11366	0.000851318	0.174304	PREDICTED: LOW QUALITY PROTEIN: V-type proton ATPase catalytic subunit A-like, partial [Columba livia]
Unigene0044442	GDF11	gi|733928641|acc|XP_010725179.1|	30.785	16.8475	-0.869693	0.000260476	0.0753901	PREDICTED: LOW QUALITY PROTEIN: growth/differentiation factor 11, partial [Meleagris gallopavo]
Unigene0044601	DSG2	gi|514704855|acc|XP_005009551.1|	4.33	2.23	-0.957323	0.000158695	0.0545715	PREDICTED: desmoglein-2 [Anas platyrhynchos]
Unigene0044817	CHAD	gi|514730512|acc|XP_005016139.1|	12.0175	5.48	-1.13289	8.00362e-06	0.0048539	PREDICTED: chondroadherin [Anas platyrhynchos]
Unigene0044847	CST3	gi|483516100|acc|EOB03086.1|	1931.01	375.74	-2.36155	6.16328e-25	4.54287e-21	Cystatin, partial [Anas platyrhynchos]
Unigene0044926	CX3CL1	gi|514794682|acc|XP_005030979.1|	8.2025	4.19	-0.969113	0.00104723	0.1983	PREDICTED: fractalkine-like [Anas platyrhynchos]
Unigene0044965	SAMD15	gi|514721251|acc|XP_005013940.1|	3.0575	1.615	-0.920818	0.00163078	0.264375	PREDICTED: sterile alpha motif domain-containing protein 15 [Anas platyrhynchos]
Unigene0044975	MIP	gi|1003996415|acc|XP_015742564.1|	2.4825	3.9275	0.661818	0.00875422	0.617461	PREDICTED: lens fiber major intrinsic protein isoform X1 [Coturnix japonica]
Unigene0045245	LTC4S	gi|902883712|acc|XP_013031558.1|	5.6825	2.135	-1.41229	0.000131728	0.0469353	PREDICTED: leukotriene C4 synthase-like [Anser cygnoides domesticus]
Unigene0046035	STOX1	gi|514704027|acc|XP_005009147.1|	5.08	1.91	-1.41126	7.68182e-07	0.000585106	PREDICTED: storkhead-box protein 1 isoform X3 [Anas platyrhynchos]
Unigene0046551	CO4	gi|514740991|acc|XP_005018393.1|	351.32	208.665	-0.751597	0.000126427	0.0453837	PREDICTED: complement C4 [Anas platyrhynchos]
Unigene0046775	RELT	gi|971379079|acc|XP_015136486.1|	37.2025	58.5675	0.654701	0.000609903	0.141368	PREDICTED: tumor necrosis factor receptor superfamily member 19L [Gallus gallus]
Unigene0047098	IQCD	gi|874492522|acc|XP_012961355.1|	4.64	2.2225	-1.06194	0.000461083	0.115861	PREDICTED: IQ domain-containing protein D isoform X1 [Anas platyrhynchos]
Unigene0047222	SELT	gi|884759129|acc|XP_005141217.2|	7.0925	11.9325	0.75053	0.00913138	0.624362	PREDICTED: selenoprotein T [Melopsittacus undulatus]
Unigene0047323	TSNAXIP1	gi|902884603|acc|XP_013032002.1|	7.7675	4.46	-0.800407	0.000649877	0.146862	PREDICTED: translin-associated factor X-interacting protein 1 isoform X6 [Anser cygnoides domesticus]
Unigene0047813	ARHGAP40	gi|874451721|acc|XP_005011739.2|	7.88	3.89	-1.01843	1.76697e-05	0.00939237	PREDICTED: rho GTPase-activating protein 40 isoform X1 [Anas platyrhynchos]
Unigene0047814	STC2	gi|514785602|acc|XP_005028827.1|	24.9575	12.9425	-0.947357	1.37917e-05	0.00781313	PREDICTED: stanniocalcin-2 [Anas platyrhynchos]
Unigene0047903	CLIC6	gi|663270923|acc|XP_008494911.1|	54.895	5.3175	-3.36785	3.2042e-44	1.77133e-39	PREDICTED: chloride intracellular channel protein 6 [Calypte anna]
Unigene0048012	-	gi|483510060|acc|EOA99471.1|	5.83	3.62	-0.687506	0.00594799	0.521175	hypothetical protein Anapl_07962 [Anas platyrhynchos]
Unigene0048283	AK7	gi|514751301|acc|XP_005020829.1|	12.6	6.82	-0.88558	0.00442656	0.450587	PREDICTED: adenylate kinase 7 [Anas platyrhynchos]
Unigene0048351	APOLD1	gi|514714123|acc|XP_005012233.1|	10.6875	3.7125	-1.52546	0.00387982	0.423878	PREDICTED: apolipoprotein L domain-containing protein 1 [Anas platyrhynchos]
Unigene0048443	RGS1	gi|514706680|acc|XP_005010421.1|	3.8725	1.9575	-0.984253	0.00605522	0.525497	PREDICTED: regulator of G-protein signaling 1 [Anas platyrhynchos]
Unigene0048445	REM1	gi|514736038|acc|XP_005017447.1|	4.78	2.9425	-0.699968	0.00512183	0.482849	PREDICTED: LOW QUALITY PROTEIN: GTP-binding protein REM 1, partial [Anas platyrhynchos]
Unigene0048493	TRIB1	gi|663246750|acc|XP_008503546.1|	10.66	4.685	-1.18609	1.98049e-06	0.00138588	PREDICTED: tribbles homolog 1 [Calypte anna]
Unigene0048705	C8B	gi|514768502|acc|XP_005024938.1|	3.72	1.4225	-1.38687	3.17261e-06	0.00208794	PREDICTED: complement component C8 beta chain [Anas platyrhynchos]
Unigene0048788	ITGBL1	gi|902879760|acc|XP_013029906.1|	113.67	69.275	-0.714445	0.00934955	0.628294	PREDICTED: integrin beta-like protein 1 [Anser cygnoides domesticus]
Unigene0048872	GPC4	gi|1051117595|acc|XP_017672866.1|	30.4475	19.645	-0.632162	0.00217905	0.310511	PREDICTED: glypican-4 [Lepidothrix coronata]
Unigene0049021	AKAP5	gi|514759244|acc|XP_005022736.1|	35.83	22.355	-0.68057	0.0466912	1	PREDICTED: A-kinase anchor protein 5 [Anas platyrhynchos]
Unigene0049668	RNASEL	gi|929046971|acc|ALF04448.1|	19.4675	11.1525	-0.8037	0.00614944	0.527464	2-5A-dependent ribonuclease [Anas platyrhynchos]
Unigene0049896	VILL	gi|902897593|acc|XP_013037972.1|	16.715	7.0825	-1.23881	9.10868e-07	0.000680461	PREDICTED: villin-like protein isoform X1 [Anser cygnoides domesticus]
Unigene0050112	PPP1R36	gi|874482535|acc|XP_012958023.1|	3.8825	1.3	-1.57847	3.01197e-06	0.00199408	PREDICTED: protein phosphatase 1 regulatory subunit 36 isoform X1 [Anas platyrhynchos]
Unigene0050134	CD44	gi|514710511|acc|XP_005011379.1|	6.4925	3.04	-1.0947	1.52022e-05	0.00840398	PREDICTED: CD44 antigen isoform X32 [Anas platyrhynchos]
Unigene0050230	TTR	gi|878276075|acc|NP_001297303.1|	14451.4	481.715	-4.90688	3.53926e-18	1.26229e-14	transthyretin precursor [Anas platyrhynchos]
Unigene0050241	TEKT1	gi|874477961|acc|XP_012956465.1|	4.945	2.35	-1.07331	5.63388e-05	0.0241434	PREDICTED: tektin-1 isoform X2 [Anas platyrhynchos]
Unigene0050320	C11orf88	gi|699653109|acc|XP_009880788.1|	13.84	6.0075	-1.20401	0.00010491	0.039997	PREDICTED: UPF0722 protein C11orf88 homolog [Charadrius vociferus]
Unigene0050471	NEK10	gi|874502888|acc|XP_012964763.1|	3.5275	2.005	-0.815044	0.00573644	0.512723	PREDICTED: serine/threonine-protein kinase Nek10 isoform X2 [Anas platyrhynchos]
Unigene0050826	OFCC1	gi|902890726|acc|XP_013034791.1|	4.27	1.145	-1.89889	1.35309e-10	2.0778e-07	PREDICTED: orofacial cleft 1 candidate gene 1 protein isoform X3 [Anser cygnoides domesticus]
Unigene0050934	OVCH1	gi|930653981|acc|KPI96316.1|	3.0425	1.0925	-1.47762	0.00169281	0.270075	Ovochymase-1 [Papilio xuthus]
Unigene0051647	CS120	gi|871247988|acc|XP_012940771.1|	3.74	10.05	1.42609	1.85204e-06	0.00131261	PREDICTED: cold-shock protein CS120-like [Aplysia californica]
Unigene0051728	SLCO5A1	gi|768369551|acc|XP_011582126.1|	2.095	3.1525	0.589546	0.00835879	0.607702	PREDICTED: solute carrier organic anion transporter family member 5A1, partial [Aquila chrysaetos canadensis]
Unigene0051755	SLC2A9	gi|874483964|acc|XP_012958523.1|	5.2775	1.1975	-2.13983	2.92283e-10	4.19684e-07	PREDICTED: solute carrier family 2, facilitated glucose transporter member 5-like [Anas platyrhynchos]
Unigene0051883	FLVCR1	gi|902878908|acc|XP_013029494.1|	252.857	131.512	-0.943125	8.92252e-08	8.96819e-05	PREDICTED: feline leukemia virus subgroup C receptor-related protein 1 [Anser cygnoides domesticus]
Unigene0052010	PRSS12	gi|514728870|acc|XP_005015745.1|	112.683	46.0375	-1.29138	1.13052e-09	1.47051e-06	PREDICTED: neurotrypsin-like isoform X1 [Anas platyrhynchos]
Unigene0052168	FAM107A	gi|514777023|acc|XP_005026965.1|	44.32	23.66	-0.905508	0.0021021	0.30554	PREDICTED: protein FAM107A [Anas platyrhynchos]
Unigene0052188	CCDC170	gi|874443940|acc|XP_012955390.1|	4.01	2.11	-0.926359	0.00180329	0.283609	PREDICTED: coiled-coil domain-containing protein 170 isoform X3 [Anas platyrhynchos]
Unigene0052428	LOC104273759	gi|699594028|acc|XP_009867484.1|	3.995	1.88	-1.08746	0.00824736	0.605882	PREDICTED: LOW QUALITY PROTEIN: probable RNA-directed DNA polymerase from transposon X-element [Apaloderma vittatum]
Unigene0052429	SLC25A30	gi|514774100|acc|XP_005026269.1|	12.86	7.5325	-0.77169	0.000664267	0.148972	PREDICTED: kidney mitochondrial carrier protein 1 isoform X1 [Anas platyrhynchos]
Unigene0052440	SLCO1C1	gi|874466314|acc|XP_012952554.1|	40.535	4.5725	-3.14811	1.50224e-23	9.22735e-20	PREDICTED: solute carrier organic anion transporter family member 1C1 isoform X3 [Anas platyrhynchos]
Unigene0052519	SLC16A12	gi|874500223|acc|XP_012963880.1|	24.845	8.9925	-1.46616	2.14565e-11	3.76555e-08	PREDICTED: monocarboxylate transporter 12 isoform X3 [Anas platyrhynchos]
Unigene0052522	DIO2	gi|874457744|acc|XP_005013949.2|	247.9	145.588	-0.767872	0.00755666	0.581654	PREDICTED: type II iodothyronine deiodinase isoform X1 [Anas platyrhynchos]
Unigene0052839	CNTNAP1	gi|699578919|acc|XP_009877366.1|	18.155	10.565	-0.781074	0.0171592	0.772886	PREDICTED: neurexin-4-like [Apaloderma vittatum]
Unigene0052969	LOC101801364	gi|514790692|acc|XP_005030047.1|	7.505	2.1725	-1.7885	1.95328e-08	2.11726e-05	PREDICTED: ovostatin [Anas platyrhynchos]
Unigene0053204	LOC104576554	gi|719781381|acc|XP_010222242.1|	3.035	1.595	-0.92814	0.00741245	0.576331	PREDICTED: 1-phosphatidylinositol 4,5-bisphosphate phosphodiesterase beta-1-like [Tinamus guttatus]
Unigene0053358	LOC257642	gi|22129763|acc|NP_671477.1|	23.8975	81.2425	1.76537	0.00559399	0.505404	rRNA promoter binding protein [Rattus norvegicus]
Unigene0053511	TF	gi|514782616|acc|XP_005028125.1|	2768.8	218.555	-3.66319	9.92442e-39	2.74318e-34	PREDICTED: serotransferrin [Anas platyrhynchos]
Unigene0053514	POLR2B	gi|527261553|acc|XP_005149022.1|	406.212	255.46	-0.669137	0.000106229	0.0402224	PREDICTED: DNA-directed RNA polymerase II subunit RPB2 [Melopsittacus undulatus]
Unigene0053695	IQCA1	gi|483502758|acc|EOA95736.1|	4.3325	1.955	-1.14803	0.000105496	0.0400825	IQ and AAA domain-containing protein, partial [Anas platyrhynchos]
Unigene0053846	CCDC37	gi|514769452|acc|XP_005025163.1|	16.8425	9.015	-0.901707	0.00104878	0.1983	PREDICTED: coiled-coil domain-containing protein 37 isoform X2 [Anas platyrhynchos]
Unigene0054024	KCNG1	gi|514706982|acc|XP_005010538.1|	39.9025	25.595	-0.640617	0.0406801	0.981887	PREDICTED: potassium voltage-gated channel subfamily G member 1 [Anas platyrhynchos]
Unigene0054247	KL	gi|768363650|acc|XP_011579060.1|	36.0475	6.2725	-2.52279	6.51629e-24	4.238e-20	PREDICTED: klotho [Aquila chrysaetos canadensis]
Unigene0054581	BCL2L1	gi|874492283|acc|XP_012961276.1|	5.8925	3.77	-0.644315	0.00634771	0.536971	PREDICTED: LOW QUALITY PROTEIN: bcl-2-like protein 1 [Anas platyrhynchos]
Unigene0054943	ALMS1	gi|874447444|acc|XP_005010194.2|	8.3475	4.465	-0.902684	0.00147161	0.247272	PREDICTED: Alstrom syndrome protein 1-like [Anas platyrhynchos]
Unigene0055154	C7orf63	gi|874468866|acc|XP_012953381.1|	15.96	7.49	-1.09142	0.00118484	0.213798	PREDICTED: cilia- and flagella-associated protein 69 isoform X1 [Anas platyrhynchos]
Unigene0055368	FXYD2	gi|874445662|acc|XP_012951804.1|	5.93	12.0825	1.02681	0.00602904	0.524014	PREDICTED: sodium/potassium-transporting ATPase subunit gamma [Anas platyrhynchos]
Unigene0055596	FAM46A	gi|527270523|acc|XP_005153207.1|	34.215	22.2575	-0.620337	0.00537875	0.497233	PREDICTED: protein FAM46A [Melopsittacus undulatus]
Unigene0056277	SLC7A10	gi|874475126|acc|XP_012955516.1|	25.695	11.6525	-1.14085	8.94273e-07	0.000672609	PREDICTED: asc-type amino acid transporter 1 [Anas platyrhynchos]
Unigene0056553	SPAG17	gi|902927359|acc|XP_013051843.1|	3.435	1.86	-0.885007	0.00699654	0.564336	PREDICTED: sperm-associated antigen 17 isoform X7 [Anser cygnoides domesticus]
Unigene0056570	-	gi|483520335|acc|EOB05849.1|	5.46	3.125	-0.805045	0.000943139	0.187211	hypothetical protein Anapl_01185 [Anas platyrhynchos]
Unigene0056697	KIAA1937	gi|874460838|acc|XP_012950782.1|	34.2725	19.3725	-0.823041	0.000972537	0.190989	PREDICTED: forkhead-associated domain-containing protein 1 isoform X6 [Anas platyrhynchos]
Unigene0057256	ELN	gi|902912078|acc|XP_013044715.1|	64.6275	27.91	-1.21137	5.30142e-08	5.52963e-05	PREDICTED: elastin [Anser cygnoides domesticus]
Unigene0057626	ZBBX	gi|874477224|acc|XP_012956192.1|	3.895	2.055	-0.922485	0.00988259	0.64318	PREDICTED: zinc finger B-box domain-containing protein 1 isoform X3 [Anas platyrhynchos]
Unigene0057682	SPACA9	gi|514718631|acc|XP_005013312.1|	30.07	17.5225	-0.779116	0.000833459	0.171921	PREDICTED: uncharacterized protein C9orf9 homolog [Anas platyrhynchos]
Unigene0058307	ARHGEF16	gi|513219457|acc|XP_004947428.1|	8.8425	4.8475	-0.867213	0.00069805	0.154666	PREDICTED: rho guanine nucleotide exchange factor 16 isoform X2 [Gallus gallus]
Unigene0058745	ARPP21	gi|676813207|acc|KFP09613.1|	4.06	2.245	-0.854764	0.00539639	0.498447	cAMP-regulated phosphoprotein 21 [Egretta garzetta]
Unigene0058757	HCN2	gi|363743778|acc|XP_003642915.1|	2.6875	4.27	0.667971	0.00165744	0.267131	PREDICTED: potassium/sodium hyperpolarization-activated cyclic nucleotide-gated channel 2 [Gallus gallus]
Unigene0058878	NR4A1	gi|729737442|acc|XP_010564840.1|	3.2275	1.3175	-1.29261	0.000158932	0.0545715	PREDICTED: nuclear receptor subfamily 4 group A member 1 [Haliaeetus leucocephalus]
Unigene0058933	GPR156	gi|902927461|acc|XP_013051896.1|	17.51	9.75	-0.844705	0.000188573	0.0615022	PREDICTED: LOW QUALITY PROTEIN: probable G-protein coupled receptor 156 [Anser cygnoides domesticus]
Unigene0059413	NFKBIZ	gi|514705286|acc|XP_005009758.1|	10.335	6.7425	-0.616183	0.00806929	0.598768	PREDICTED: NF-kappa-B inhibitor zeta isoform X1 [Anas platyrhynchos]
Unigene0059711	FAM3B	gi|719766450|acc|XP_010217715.1|	4.75	2.0975	-1.17926	0.000252851	0.0737623	PREDICTED: protein FAM3B-like, partial [Tinamus guttatus]
Unigene0059714	BACE2	gi|944213113|acc|KQK79738.1|	10.85	5.9	-0.878908	0.00064265	0.146502	beta-secretase 2 [Amazona aestiva]
Unigene0059744	LEPR	gi|155733544|acc|ABU39916.1|	3.6625	1.615	-1.18129	2.90199e-06	0.00193285	leptin receptor, partial [Anas platyrhynchos]
Unigene0059796	SGK1	gi|483519653|acc|EOB05366.1|	86.3875	53.3125	-0.696349	0.000144908	0.0503819	Serine/threonine-protein kinase Sgk1, partial [Anas platyrhynchos]
Unigene0060129	COL4A4	gi|874487550|acc|XP_012959708.1|	14.705	6.37	-1.20694	5.57764e-07	0.000443655	PREDICTED: collagen alpha-4(IV) chain isoform X1 [Anas platyrhynchos]
Unigene0060135	HEXB	gi|483522427|acc|EOB07122.1|	5.29	3.395	-0.639856	0.00777445	0.587537	Beta-hexosaminidase subunit beta, partial [Anas platyrhynchos]
Unigene0060338	NPNT	gi|874474515|acc|XP_005019904.2|	52.57	17.045	-1.62489	1.13775e-11	2.06219e-08	PREDICTED: nephronectin isoform X4 [Anas platyrhynchos]
Unigene0060486	AADACL4	gi|723132623|acc|XP_010282788.1|	9.9675	6.505	-0.615683	0.0331976	0.936095	PREDICTED: arylacetamide deacetylase-like 4 [Phaethon lepturus]
Unigene0060762	STXBP5L	gi|723127699|acc|XP_010280067.1|	3.86	1.9225	-1.00562	0.00255406	0.337078	PREDICTED: syntaxin-binding protein 5-like [Phaethon lepturus]
Unigene0060796	SPAG6	gi|146199374|acc|ABQ09478.1|	26.4175	15.1175	-0.805274	0.000389113	0.101947	axoneme central apparatus protein, partial [Anas platyrhynchos]
Unigene0061394	CFAP46	gi|874474077|acc|XP_005019776.2|	14.5225	6.0575	-1.2615	0.000909862	0.181607	PREDICTED: cilia- and flagella-associated protein 46 [Anas platyrhynchos]
Unigene0061570	CFAP99	gi|514730850|acc|XP_005016216.1|	12.715	8.2825	-0.618393	0.0487763	1	PREDICTED: cilia- and flagella-associated protein 99 isoform X1 [Anas platyrhynchos]
Unigene0061727	PPIL6	gi|874464727|acc|XP_012952051.1|	10.3675	1.61	-2.68694	8.60175e-10	1.14583e-06	PREDICTED: peptidyl-prolyl cis-trans isomerase-like 6 [Anas platyrhynchos]
Unigene0061807	DNAJA4	gi|677363425|acc|KFP93891.1|	6.7075	3.93	-0.771246	0.00906706	0.621705	DnaJ subfamily A member 4, partial [Haliaeetus albicilla]
Unigene0063576	FOLR3	gi|874470365|acc|XP_005018496.2|	25.4175	2.9475	-3.10826	3.39034e-29	3.12372e-25	PREDICTED: folate receptor gamma [Anas platyrhynchos]
Unigene0063794	SSPO	gi|110082727|acc|NP_001006351.2|	16.0175	26.2125	0.710606	0.0074088	0.576331	SCO-spondin precursor [Gallus gallus]
Unigene0063807	CFAP43	gi|874443970|acc|XP_012956238.1|	17.2475	10.7925	-0.676358	0.00658991	0.547408	PREDICTED: cilia- and flagella-associated protein 43, partial [Anas platyrhynchos]
Unigene0063866	SLC13A3	gi|902869575|acc|XP_013044940.1|	80.1925	52.325	-0.615967	0.000901118	0.18049	PREDICTED: solute carrier family 13 member 3 [Anser cygnoides domesticus]
Unigene0064003	TMEM2	gi|971413117|acc|XP_015147522.1|	6.5025	3.07	-1.08276	0.000115714	0.0429319	PREDICTED: transmembrane protein 2 isoform X1 [Gallus gallus]
Unigene0064006	CEMIP	gi|514778726|acc|XP_005027213.1|	40.0325	9.5575	-2.06647	1.42555e-12	3.15226e-09	PREDICTED: cell migration-inducing and hyaluronan-binding protein isoform X1 [Anas platyrhynchos]
Unigene0064243	SLC6A13	gi|514711124|acc|XP_005011521.1|	17.635	4.1025	-2.10387	4.72476e-16	1.41185e-12	PREDICTED: LOW QUALITY PROTEIN: sodium- and chloride-dependent GABA transporter 2 [Anas platyrhynchos]
Unigene0065351	SLC2A11	gi|874485073|acc|XP_012958890.1|	5.3425	3.245	-0.719297	0.00397463	0.429147	PREDICTED: solute carrier family 2, facilitated glucose transporter member 11 isoform X3 [Anas platyrhynchos]
Unigene0065841	GLIPR1	gi|902871384|acc|XP_013053210.1|	51.2425	26.0225	-0.977581	6.7301e-06	0.00413389	PREDICTED: glioma pathogenesis-related protein 1 [Anser cygnoides domesticus]
Unigene0065941	ADSS	gi|676245390|acc|KFO09262.1|	45.72	21.82	-1.06717	0.000563701	0.133457	hypothetical protein N312_03538, partial [Balearica regulorum gibbericeps]
Unigene0066096	KRT75	gi|483495325|acc|EOA93545.1|	4.6175	2.585	-0.836948	0.00860454	0.614166	Keratin, type II cytoskeletal 75, partial [Anas platyrhynchos]
Unigene0066528	DRC7	gi|874474911|acc|XP_012955457.1|	11.105	6.38	-0.799581	0.000776613	0.164492	PREDICTED: dynein regulatory complex subunit 7 isoform X2 [Anas platyrhynchos]
Unigene0067073	EPS8L2	gi|902931504|acc|XP_013053827.1|	15.99	8.9	-0.845293	0.000214995	0.066959	PREDICTED: epidermal growth factor receptor kinase substrate 8-like protein 2 [Anser cygnoides domesticus]
Unigene0067231	FAM160A1	gi|514724731|acc|XP_005014752.1|	95.38	5.84	-4.02965	1.70897e-33	2.69927e-29	PREDICTED: protein FAM160A1 [Anas platyrhynchos]
Unigene0067304	SPEF2	gi|902895797|acc|XP_013037203.1|	12.9075	6.52	-0.985266	0.016089	0.755994	PREDICTED: sperm flagellar protein 2 isoform X1 [Anser cygnoides domesticus]
Unigene0067726	IQCH	gi|874501841|acc|XP_012964414.1|	10.5125	6.01	-0.806669	0.000558617	0.133396	PREDICTED: IQ domain-containing protein H isoform X3 [Anas platyrhynchos]
Unigene0068349	GABRD	gi|874450133|acc|XP_012947167.1|	7.8925	3.5025	-1.1721	0.000199094	0.0636199	PREDICTED: gamma-aminobutyric acid receptor subunit delta isoform X2 [Anas platyrhynchos]
Unigene0068353	CFAP74	gi|874450116|acc|XP_012947158.1|	13.2125	7.455	-0.825623	0.00805237	0.597914	PREDICTED: cilia- and flagella-associated protein 74 isoform X3 [Anas platyrhynchos]
Unigene0068644	SOD3	gi|483513531|acc|EOB01587.1|	571.258	150.528	-1.92411	1.16479e-19	4.76971e-16	Extracellular superoxide dismutase [Cu-Zn], partial [Anas platyrhynchos]
Unigene0069277	TRPM3	gi|902923386|acc|XP_013049965.1|	34.085	18.8425	-0.855147	0.00611571	0.526155	PREDICTED: transient receptor potential cation channel subfamily M member 3 isoform X1 [Anser cygnoides domesticus]
Unigene0070363	MMP24	gi|768388477|acc|XP_011589736.1|	2.6975	18.5825	2.78425	2.37212e-06	0.00160901	PREDICTED: matrix metalloproteinase-24 isoform X1 [Aquila chrysaetos canadensis]
Unigene0070862	SERPING1	gi|733888733|acc|XP_010709497.1|	3.16	1.6175	-0.966159	0.00656854	0.546454	PREDICTED: plasma protease C1 inhibitor [Meleagris gallopavo]
Unigene0072107	ZBTB4	gi|927190430|acc|XP_013929144.1|	5.89	11.995	1.02609	0.01328	0.711029	PREDICTED: zinc finger and BTB domain-containing protein 4 [Thamnophis sirtalis]
Unigene0077214	TPH1	gi|514784056|acc|XP_005028461.1|	18.745	7.2225	-1.37594	0.0106414	0.658022	PREDICTED: tryptophan 5-hydroxylase 1 isoform X1 [Anas platyrhynchos]
Unigene0077408	PAX2	gi|224052465|acc|XP_002197955.1|	3	4.6025	0.617455	0.00321189	0.378874	PREDICTED: paired box protein Pax-2 isoform X2 [Taeniopygia guttata]
Unigene0077848	MSX2	gi|768346100|acc|XP_011569798.1|	14.415	1.41	-3.3538	5.73149e-33	7.041e-29	PREDICTED: homeobox protein MSX-2 [Aquila chrysaetos canadensis]
Unigene0077975	PTPN2	gi|677301695|acc|KFP84123.1|	3.2275	1.525	-1.08161	2.72857e-05	0.0136506	hypothetical protein N311_12544, partial [Apaloderma vittatum]
Unigene0078971	SFTPC	gi|729730896|acc|XP_010561294.1|	7.9775	12.035	0.593228	0.00402877	0.4333	PREDICTED: pulmonary surfactant-associated protein C [Haliaeetus leucocephalus]
Unigene0079328	TMEM114	gi|729759859|acc|XP_010576823.1|	9.0875	6.04	-0.589335	0.0302805	0.911738	PREDICTED: transmembrane protein 114 [Haliaeetus leucocephalus]
Unigene0080391	C22H8ORF4	gi|118101403|acc|XP_001232955.1|	15.2625	8.615	-0.825069	0.0134062	0.714904	PREDICTED: protein C8orf4 homolog [Gallus gallus]
Unigene0082460	PXYLP1	gi|874481096|acc|XP_012957555.1|	23.18	13.6325	-0.76583	0.000425687	0.108947	PREDICTED: 2-phosphoxylose phosphatase 1 isoform X6 [Anas platyrhynchos]
Unigene0082519	GRP	gi|874484487|acc|XP_012958723.1|	69.1475	104.45	0.595063	0.0005524	0.132484	PREDICTED: gastrin-releasing peptide, partial [Anas platyrhynchos]
Unigene0083517	TGFB3	gi|542141433|acc|XP_005479839.1|	4.0725	6.4975	0.67397	0.00319252	0.377512	PREDICTED: transforming growth factor beta-3 [Zonotrichia albicollis]
Unigene0085048	RLBP1	gi|514790838|acc|XP_005030082.1|	5.3175	1.6975	-1.64734	0.00164656	0.266543	PREDICTED: retinaldehyde-binding protein 1 isoform X2 [Anas platyrhynchos]
Unigene0085080	IGF2	gi|1003779140|acc|XP_015719328.1|	7.1425	3.8925	-0.875732	0.00820736	0.603746	PREDICTED: insulin-like growth factor II [Coturnix japonica]
Unigene0085128	ANKFN1	gi|874453355|acc|XP_012948201.1|	14.9275	9.41	-0.665706	0.0428221	0.996654	PREDICTED: ankyrin repeat and fibronectin type-III domain-containing protein 1 isoform X2 [Anas platyrhynchos]
Unigene0087161	MSMB	gi|514757248|acc|XP_005022270.1|	25.1825	1.2575	-4.32379	3.71136e-20	1.64135e-16	PREDICTED: beta-microseminoprotein-like [Anas platyrhynchos]
Unigene0092216	CXCL12	gi|683904498|acc|XP_009085571.1|	25.1075	13.9575	-0.847078	3.07168e-05	0.014961	PREDICTED: stromal cell-derived factor 1 [Serinus canaria]
Unigene0092487	LOC104525861	gi|704315802|acc|XP_010167435.1|	3.655	1.7175	-1.08956	4.76209e-05	0.0208933	PREDICTED: zinc finger protein ZIC 4-like, partial [Caprimulgus carolinensis]
Unigene0092631	CA9	gi|902895531|acc|XP_013037068.1|	11.5225	2.445	-2.23655	1.0587e-15	3.00135e-12	PREDICTED: LOW QUALITY PROTEIN: carbonic anhydrase 9 [Anser cygnoides domesticus]
Unigene0092710	SLC22A6	gi|902939259|acc|XP_013057677.1|	19.79	12.3075	-0.685234	0.00260766	0.33999	PREDICTED: LOW QUALITY PROTEIN: solute carrier family 22 member 6-A-like [Anser cygnoides domesticus]
Unigene0092932	PRDM12	gi|118099311|acc|XP_415465.2|	16.8525	7.0025	-1.26702	0.00443425	0.450587	PREDICTED: PR domain zinc finger protein 12 [Gallus gallus]
Unigene0093066	C1QL3	gi|938077550|acc|KPP74035.1|	2.8025	4.33	0.627653	0.00250526	0.333722	complement C1q-like protein 3-like [Scleropages formosus]
Unigene0093695	TPD52L1	gi|768397441|acc|XP_011594522.1|	43.7675	26.0025	-0.75121	0.0107334	0.659553	PREDICTED: tumor protein D53 isoform X2 [Aquila chrysaetos canadensis]
Unigene0093839	UTS2B	gi|874500700|acc|XP_012964038.1|	7.15	11.2125	0.649093	0.00471186	0.462252	PREDICTED: urotensin-2B [Anas platyrhynchos]
Unigene0094088	C1S	gi|514733347|acc|XP_005016825.1|	12.4075	7.9625	-0.639919	0.0206746	0.816957	PREDICTED: complement C1s subcomponent [Anas platyrhynchos]
Unigene0094360	PMP2	gi|697013809|acc|XP_009580910.1|	11.3325	17.1575	0.598373	0.000411376	0.106259	PREDICTED: myelin P2 protein-like [Fulmarus glacialis]
Unigene0094954	PROCA1	gi|1051209401|acc|XP_017687955.1|	152.463	25.24	-2.59467	4.09124e-30	4.11218e-26	PREDICTED: protein PROCA1 [Lepidothrix coronata]
Unigene0099252	SLC6A2	gi|944214352|acc|KQK80910.1|	80.9825	128.512	0.666227	6.58177e-06	0.00406536	sodium-dependent noradrenaline transporter [Amazona aestiva]
Unigene0099347	ITIH2	gi|514757353|acc|XP_005022294.1|	12.8625	8.2425	-0.642017	0.0249315	0.869575	PREDICTED: inter-alpha-trypsin inhibitor heavy chain H2 [Anas platyrhynchos]
Unigene0099717	NDNF	gi|514719682|acc|XP_005013569.1|	10.54	17.5725	0.737445	0.00751898	0.58	PREDICTED: protein NDNF isoform X1 [Anas platyrhynchos]
Unigene0101571	S100A6	gi|514712019|acc|XP_005011728.1|	15.69	8.0525	-0.962337	0.00033496	0.0914423	PREDICTED: protein S100-A6 isoform X1 [Anas platyrhynchos]
Unigene0105073	-	gi|449281914|acc|EMC88862.1|	6.7675	10.3775	0.616764	0.0446142	1	hypothetical protein A306_02241, partial [Columba livia]
Unigene0107172	MPZ	gi|971445458|acc|XP_015158025.1|	15.4275	35.725	1.21143	2.18546e-08	2.32338e-05	PREDICTED: LOW QUALITY PROTEIN: myelin protein P0 [Gallus gallus]
Unigene0107451	hlh-13	gi|902889192|acc|XP_013034088.1|	2.695	6.4725	1.26404	2.34997e-06	0.00160383	PREDICTED: helix-loop-helix protein 13-like [Anser cygnoides domesticus]
Unigene0108530	CPN1	gi|471014333|acc|NP_001264183.1|	7.8375	3.02	-1.37584	1.69724e-08	1.85794e-05	carboxypeptidase N catalytic chain precursor [Gallus gallus]
Unigene0113879	TMEM255B	gi|971376952|acc|XP_015133392.1|	16.8075	6.8325	-1.29862	7.57734e-07	0.000581787	PREDICTED: transmembrane protein 255B isoform X1 [Gallus gallus]
Unigene0114050	CYR61	gi|591348498|acc|XP_007068802.1|	9.0575	5.6025	-0.693042	0.00584226	0.518137	PREDICTED: protein CYR61 isoform X1 [Chelonia mydas]
Unigene0114056	CAPN6	gi|874461372|acc|XP_012950963.1|	6.09	3.4475	-0.820892	0.00171339	0.272572	PREDICTED: calpain-6 isoform X2 [Anas platyrhynchos]
Unigene0114162	EN1	gi|543348552|acc|XP_005534710.1|	11.0175	18.7975	0.770744	5.85586e-06	0.00363731	PREDICTED: LOW QUALITY PROTEIN: homeobox protein engrailed-1 [Pseudopodoces humilis]
Unigene0114245	BTG1	gi|483505380|acc|EOA96980.1|	2.355	3.8525	0.710068	0.00159299	0.260541	Protein BTG1 [Anas platyrhynchos]
Unigene0114930	PIFO	gi|514762321|acc|XP_005023462.1|	5.2025	1.835	-1.50342	3.93956e-07	0.00033765	PREDICTED: protein pitchfork [Anas platyrhynchos]
