# Supplementary material for: Hypothalamic transcriptome analysis reveals the neuroendocrine mechanisms in controlling broodiness of Muscovy duck (Cairina moschata)
Source: PLoS One. 2019 May 9;14(5):e0207050. doi: 10.1371/journal.pone.0207050 (PMC6508920; doi:10.1371/journal.pone.0207050)
Supplement: S5 Table — (XLSX) [file pone.0207050.s006.xlsx]

## Sheet: Sheet1
GeneID	Pairwise comparison	control_mean	treat_mean	log2(fc)	PValue	Gene Symbol	Description	TF_Family
Unigene0035513	LA-BP	5.06	2.3275	-1.12036	0.000184187	FOSB	protein fosB	TF_bZIP
Unigene0036185		149.877	94.7875	-0.661015	0.002625	Id4	DNA-binding protein inhibitor ID-4 isoform X2	bHLH
Unigene0056429		3.195	5.865	0.876315	0.000235967	IRF6	interferon regulatory factor 6	IRF
Unigene0072107		11.81	5.89	-1.00367	0.00824268	ZBTB4	zinc finger and BTB domain-containing protein 4	zf-C2H2
Unigene0077848		6.19	14.415	1.21956	1.40065e-05	MSX2	homeobox protein MSX-2	Homeobox
Unigene0001935	LA-BM	2.2475	3.9075	0.797925	0.000534642	FOXA1	hepatocyte nuclear factor 3-alpha	Fork_head
Unigene0006425		90.3025	43.2275	-1.06282	0.00261691	C-FOS	proto-oncogene c-Fos	TF_bZIP
Unigene0009937		4.37	1.8575	-1.23427	0.00387591	JUND	transcription factor jun-D-like	TF_bZIP
Unigene0010561		30.9175	17.8825	-0.789875	0.00362837	RFX3	transcription factor RFX3 isoform X1	RFX
Unigene0021655		8.74	4.0325	-1.11596	0.00087537	NR4A3	neuron-derived nuclear orphan receptor, partial	NGFIB-like
Unigene0021790		146.265	85.0925	-0.781481	0.00342853	JUN	transcription factor AP-1	TF_bZIP
Unigene0053769		59.305	92.8575	0.646865	0.00173123	ZBTB16	zinc finger and BTB domain-containing protein 16 isoform X2	ZBTB
Unigene0058878		4.115	1.3175	-1.64309	1.14304e-05	NR4A1	nuclear receptor subfamily 4 group A member 1	NGFIB-like
Unigene0062157		24.555	15.175	-0.69432	0.00949462	NFIB	nuclear factor 1 B-type isoform X4	CTF_NFI
Unigene0077408		2.7575	4.6025	0.739057	0.00909238	PAX2	paired box protein Pax-2 isoform X2	PAX
Unigene0077848		6.19	1.41	-2.13424	2.71634e-10	MSX2	homeobox protein MSX-2	Homeobox
Unigene0022301		14.92	9.3875	-0.668435	0.0218073	SMAD6	mothers against decapentaplegic homolog 6-like	MH1
Unigene0025641		6.4925	10.82	0.736854	0.0395169	FEV	Protein FEV, partial	ETS
Unigene0027842		14.0025	8.3525	-0.745404	0.0282296	OTX2	homeobox protein OTX2	TF_Otx
Unigene0043370		20.5525	13.13	-0.646447	0.0266442	ZNF654	zinc finger protein 654	zf-C2H2
Unigene0052988		48.59	31.95	-0.604844	0.0404523	BDP1	transcription factor TFIIIB component B'' homolog	MYB
Unigene0054703		27.79	18.0875	-0.619573	0.0136758	TTF1	transcription termination factor 1	MYB
Unigene0114162		11.9825	18.7975	0.649612	0.0111785	EN1	LOW QUALITY PROTEIN: homeobox protein engrailed-1	Homeobox
Unigene0011116	BP-BM	10.785	7.0125	-0.621025	0.002144	RFX2	LOW QUALITY PROTEIN: DNA-binding protein RFX2-like, partial	RFX
Unigene0018611		11.4375	6.5625	-0.801454	0.00114229	FOXJ1	Forkhead box protein J1, partial	Fork_head
Unigene0021655		7.3325	4.0325	-0.862631	0.00157028	NR4A3	neuron-derived nuclear orphan receptor, partial	NGFIB-like
Unigene0021889		14.7675	8.6525	-0.771237	0.00131674	MYOD1	myogenic differentiation 1	bHLH
Unigene0025641		5.48	10.82	0.981453	3.59008e-05	FEV	Protein FEV, partial	ETS
Unigene0025671		3.025	1.3725	-1.14013	0.00241718	PER2	period circadian protein homolog 2 isoform X3	bHLH
Unigene0027842		20.9425	8.3525	-1.32615	6.99118e-09	OTX2	homeobox protein OTX2	TF_Otx
Unigene0027985		4.6225	2.21	-1.06463	1.06822e-05	MYB	transcriptional activator Myb isoform X3	MYB
Unigene0034587		8.44	3.0625	-1.46253	0.000595933	PRDM16	PR domain zinc finger protein 16 isoform X4	zf-C2H2
Unigene0058878		3.2275	1.3175	-1.29261	0.000158932	NR4A1	nuclear receptor subfamily 4 group A member 1	NGFIB-like
Unigene0077408		3	4.6025	0.617455	0.00321189	PAX2	paired box protein Pax-2 isoform X2	PAX
Unigene0077848		14.415	1.41	-3.3538	5.73149e-33	MSX2	homeobox protein MSX-2	Homeobox
Unigene0092932		16.8525	7.0025	-1.26702	0.00443425	PRDM12	PR domain zinc finger protein 12	zf-C2H2
Unigene0107451		2.695	6.4725	1.26404	2.34997e-06	hlh-13	helix-loop-helix protein 13-like	bHLH
Unigene0114162		11.0175	18.7975	0.770744	5.85586e-06	EN1	LOW QUALITY PROTEIN: homeobox protein engrailed-1	Homeobox
Unigene0006425		73.29	43.2275	-0.761667	0.0265008	C-FOS	proto-oncogene c-Fos	TF_bZIP
Unigene0072107		5.89	11.995	1.02609	0.01328	ZBTB4	zinc finger and BTB domain-containing protein 4	zf-C2H2
